# Supplementary material for: Tetraphenylene-based semiconductive metal–organic framework crystals for direct X-ray detection and imaging
Source: Royal Society of Chemistry journal article supplement (doi:10.1039/d4cc01188k), 2024-01-01
Supplement: d4cc01188k1.pdf [file d4cc01188k1.pdf]

## Electronic Supplementary Information

### **Tetraphenylene-based semiconductive metal–organic framework crystals for direct X-ray detection and imaging**

Qi Luo,<sup>a,b</sup> Yuxia Li,<sup>a,b</sup> Xin Huang,<sup>b</sup> Yi Zheng,<sup>b</sup> Qi Gu,<sup>\*,c</sup> Shuaihua

Wang<sup>\*,b,d</sup> and Shaofan Wu<sup>b,d</sup>

*<sup>a</sup>College of Chemistry and Materials Science, Fujian Normal University, Fuzhou, Fujian 350007, China.*

*<sup>b</sup>State Key Laboratory of Structural Chemistry, Fujian Institute of Research on Structure of Matter, Chinese Academy of Sciences, Fuzhou, Fujian 350002, China.*

*<sup>c</sup>College of Materials Science and Engineering, Sichuan University, Chengdu 610065, Sichuan, China*

*<sup>d</sup>University of Chinese Academy of Science (UCAS), Beijing 100049, China.*

*\*:Corresponding author: shwang@fjirsm.ac.cn (S. H. Wang)*

## Experimental

### Materials

The organic ligand tetrakis(4-carboxyphenyl)ethylene (H<sub>4</sub>TCPE, 98%) was purchased from Zhengzhou Ruke Biotech Co., Ltd. Metal ion salt PbCl<sub>2</sub> (99.999%) was purchased from Aladdin. N,N-Dimethylformamide (DMF, AR) was purchased from Sinopharm Chemical Reagent Co., Ltd. Deionized water was self-prepared and used for all experiments. All of the chemicals were purchased from commercial sources and were used without further purification.

### Synthesis of Pb<sub>2</sub>(TCPE)(DMF)<sub>2</sub>·H<sub>2</sub>O (Pb-TCPE)

PbCl<sub>2</sub> (33.4 mg, 0.12 mmol) and H<sub>4</sub>TCPE (30.5 mg, 0.06 mmol) were added to 6 mL mixed solvent of DMF/H<sub>2</sub>O (5:1, V/V). The resultant solution was sealed in a 20 mL Pyrex scintillation vial and sonicated in an ultrasonic cleaner for 10 minutes to mix well. The reaction mixture was slowly heated to 100 °C, kept at 100 °C for 72 h, and cooled to room temperature. Colourless transparent plate crystals of Pb-TCPE were formed, then collected and washed with DMF several times, and finally dried in a drying oven at 65 °C for 6 h. Anal. calcd (%) for C<sub>36</sub>H<sub>32</sub>N<sub>2</sub>O<sub>11</sub>Pb<sub>2</sub>: C 39.92, H 2.98, N 2.59. Found (%): C 39.61, H 2.93, N 2.49. FT-IR (KBr pellet, cm<sup>-1</sup>): ν = 3350 (m), 2929 (w), 1716 (w), 1668 (s), 1583 (m), 1533 (s), 1390 (s), 1226 (m), 1172 (w), 1105 (w), 1055 (s), 958 (w), 839 (w), 765 (m), 713 (w), 611 (m), 513 (w).

### Preparation of Pb-TCPE microcrystalline wafer

An appropriate amount of Pb-TCPE microcrystalline powder was weighed and molded under pressure at 5 MPa to prepare microcrystalline wafer with a diameter of 6 mm and a thickness of about 0.7 mm. The silver paste was evenly coated on both sides of the wafer to form Ag electrodes, and then the gold wires were fixed on the electrodes and connected to the electrical testing equipment. The schematic diagram of the simple Ag/Pb-TCPE/Ag detector with a symmetrical structure is shown in Fig. 3b in the text.

### Physical characterization and fluorescence testing

Elemental analyses were obtained with a German Elementar vario MICRO cube elemental analyzer. The FT-IR spectrum was measured by Bruker Optics VERTEX70 fourier transform infrared spectrometer using KBr pellets in the range of 4000-400 cm<sup>-1</sup>.

X-ray diffraction patterns were recorded on a Rigaku Miniflex 600 system at 40 kV and 40 mA using a graphite-monochromated Cu-K $\alpha$  radiation source with a step size of 0.02°, the data were collected within a 2 $\theta$  range of 5–55°. Thermogravimetric analysis (TGA) and differential scanning calorimetry (DSC) were performed using a METTLER TOLEDO analyzer at a heating rate of 10 K min<sup>-1</sup> under nitrogen atmosphere. The UV–Vis absorption spectrum was obtained at room temperature on a PerkinElmer Lambda 950 spectrophotometer and with BaSO<sub>4</sub> as a reference. The photoluminescence spectra were recorded on a fluorescence spectrophotometer (Edinburgh FLS 1000) using a 450 W xenon lamp as the excitation source. Luminescence lifetimes were measured using the same fluorescence spectrophotometer with a nanosecond lamp.

### **Single crystal X-ray crystallography testing**

Single-crystal X-ray diffraction data of Pb-TCPE were performed using a Rigaku MetalJet D2+ CCD diffractometer equipped with a micro-focus metaljet Ga-K $\alpha$  radiation ( $\lambda = 1.3405 \text{ \AA}$ ) at 293 K. The intensity data sets were collected using the  $\omega$  scan technique and reduced using the CrysAlisPro software. The structure was solved by direct methods and refined by full-matrix least square on  $F^2$  using the Olex2-1.2 software. All atoms except hydrogen were refined anisotropically. The hydrogen atoms were calculated in idealized positions and refined using the riding model. Crystal data for Pb-TCPE is summarized in [Table S1](#).

### **X-ray detection and imaging testing**

The tungsten target X-ray excitation source (10W) is used to generate X-rays, and the Keithley 2450 sourcemeter is used to test various electrical properties of the sample under X-rays. The X-ray detection and imaging test platform is built under the condition of ensuring safety.

### **Theoretical calculations**

The calculation model of Pb-TCPE was imported from single crystal X-ray diffraction data, and then established through geometry optimization. The calculation of Band structure and Density of states were carried out by the CASTEP code and the GGA-PBE functional in the Materials Studio 2017 software package.

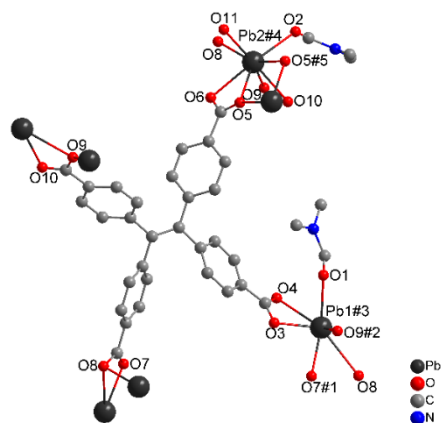

Fig. S1 The asymmetric unit of Pb-TCPE. The symmetric codes for compound: #1  $1/2 - x, 1/2 + y, 3/2 - z$ ; #2  $1 - x, 1 - y, 1 - z$ ; #3  $1 - x, 1 - y, 2 - z$ ; #4  $-1/2 + x, 1/2 - y, -1/2 + z$ ; #5  $3/2 - x, -1/2 + y, 1/2 - z$ .

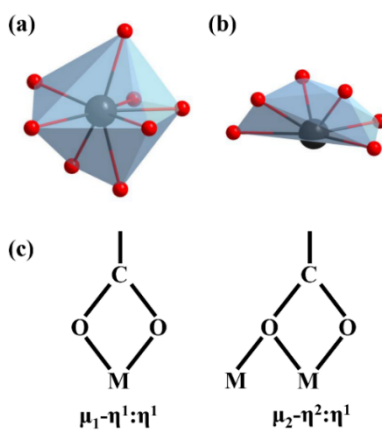

Fig. S2 (a) The holo-directed coordination structure of Pb2(II) (eight coordinated). (b) The hemi-directed coordination structure of Pb1(II) (six coordinated). (c) The coordination modes of carboxylate group with Pb<sup>2+</sup>.

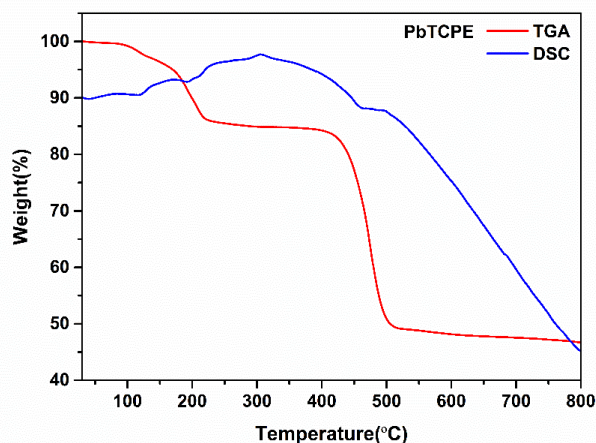

Fig. S3 The TGA and DSC curves of Pb-TCPE.

As shown in Fig.S3, thermogravimetric analysis (TGA) and differential scanning calorimetry (DSC) were performed using a METTLER TOLEDO analyzer at a heating rate of  $10 \text{ K}\cdot\text{min}^{-1}$  under nitrogen atmosphere. Starting temperature is room temperature.

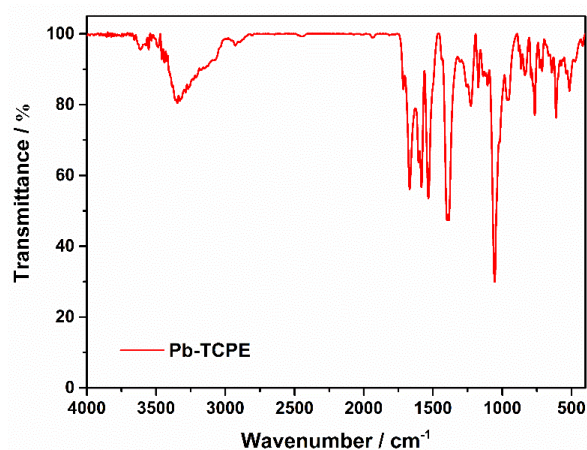

Fig. S4 The FT-IR spectrum of Pb-TCPE.

As shown in Fig. S4. The peak at  $3529.6 \text{ cm}^{-1}$  corresponds to O-H bonds in water molecules. This is due to the fact that the KBr used in the test is susceptible to deliquescence. It's hard to avoid this in testing. As the  $\text{Pb}^{2+}$  replaces the oxygen atom of the carboxyl group in tetrakis(4-carboxyphenyl)ethene, the C=O stretching vibrational peak is usually shifted, appears at  $1674.7 \text{ cm}^{-1}$ . C=C (benzene ring) stretching vibration, similar to tetrakis(4-carboxyphenyl)ethylene, the C=C stretching vibration peaks usually appear in the range of about  $1600\text{-}1500 \text{ cm}^{-1}$ . C-H (benzene ring) bending vibration, similar to tetrakis(4-carboxyphenyl)ethylene, the peak at  $757.8 \text{ cm}^{-1}$ . The C-H (vinyl) bending vibration caused a peak at  $1056.6 \text{ cm}^{-1}$ . As for the peak

at  $571\text{ cm}^{-1}$ , this peak corresponds to the stretching vibration of the Pb-O bond.

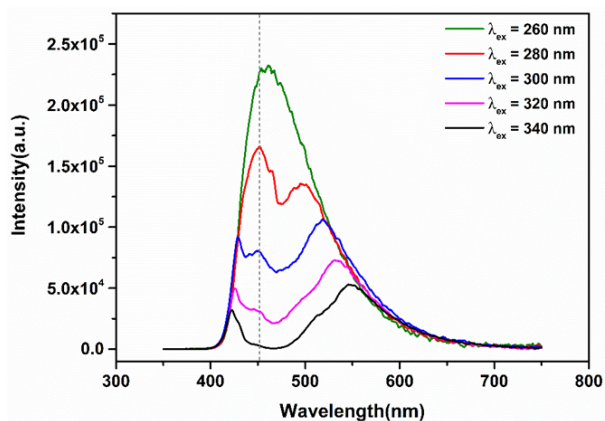

Fig. S5 Photoluminescence spectra of Pb-TCPE at different excitation wavelengths.

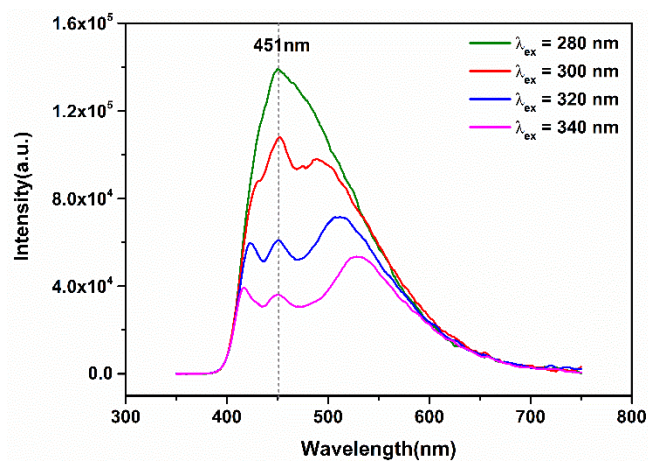

Fig. S6 Photoluminescence spectra of H<sub>4</sub>TCPE at different excitation wavelengths.

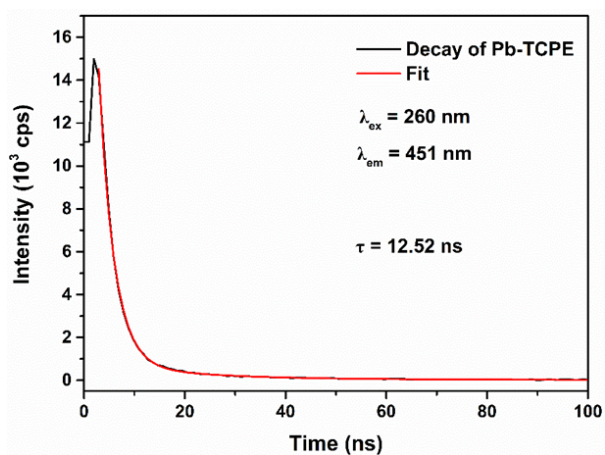

Fig. S7 TRPL decay curve of Pb-TCPE

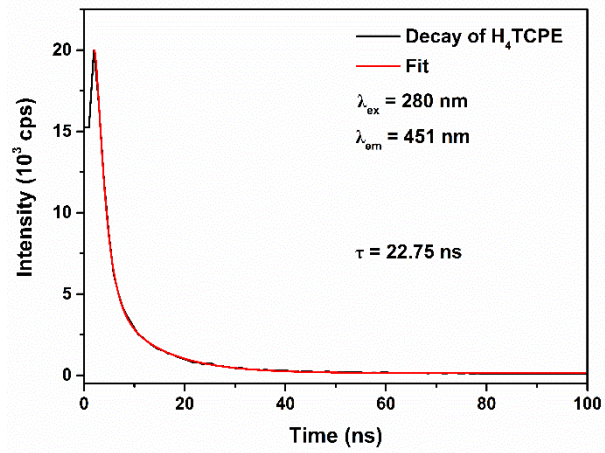

Fig. S8 TRPL decay curve of H<sub>4</sub>TCPE.

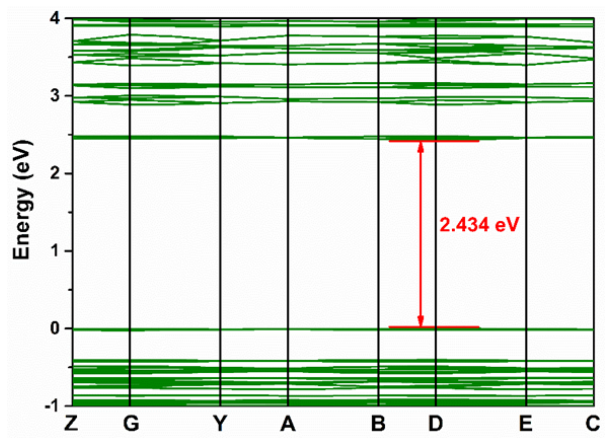

Fig. S9 The energy band structure of Pb-TCPE.

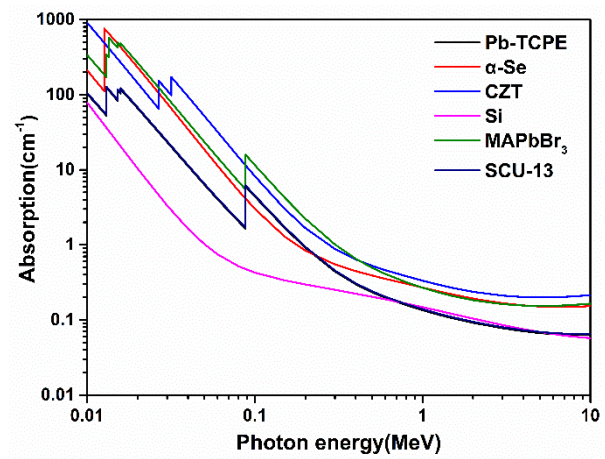

Fig. S10 The absorption coefficients of Pb-TCPE and several semiconductors for X-rays.



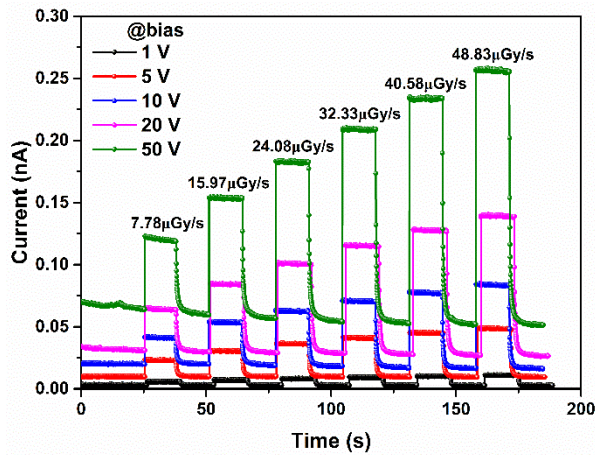

Fig. S11 Photocurrent responses of detector based on Pb-TCPE single crystal to X-rays, I-t curves were recorded by turning X-rays on and off at different dose rates and different bias voltages.

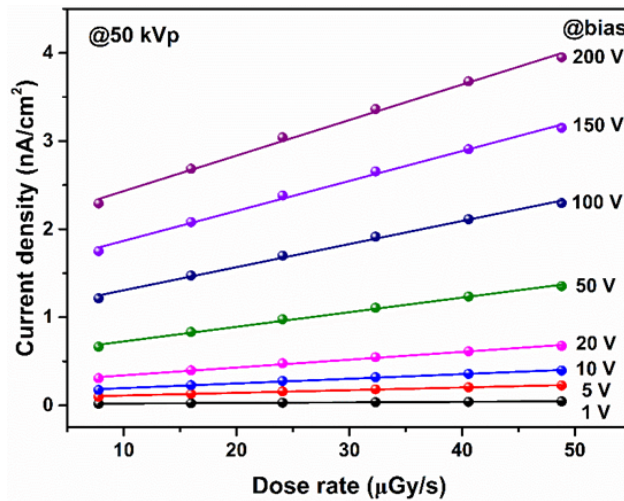

Fig. S12 X-ray-generated photocurrent density versus dose rate in Pb-TCPE microcrystalline wafer

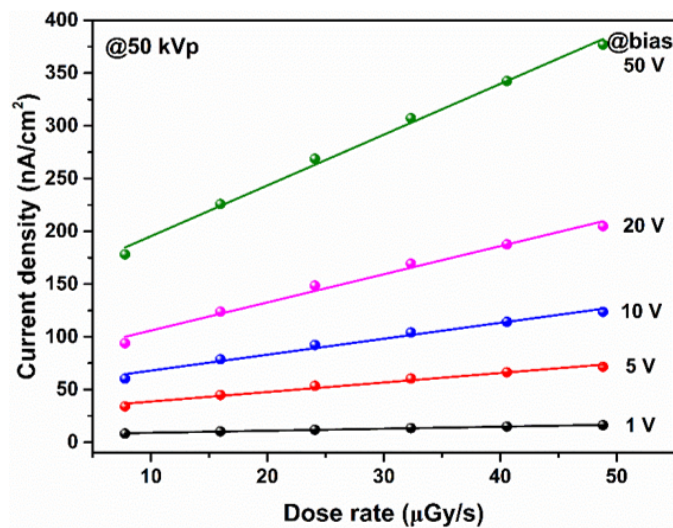

Fig. S13 X-ray-generated photocurrent density versus dose rate in Pb-TCPE single crystal detectors.



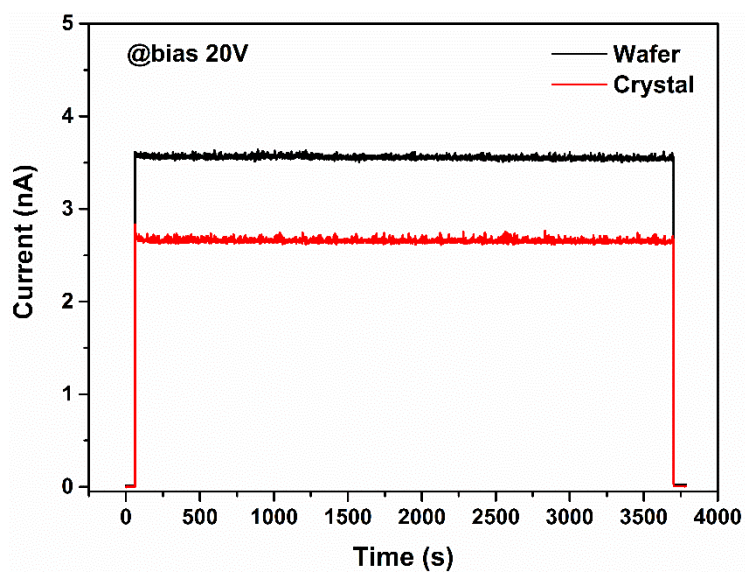

Fig. S14 Stability of Pb-TCPE X-ray detectors. Photocurrent response was measured for 1 h under X-ray with a tube voltage of 50 kV and tube current of 60  $\mu$ A.

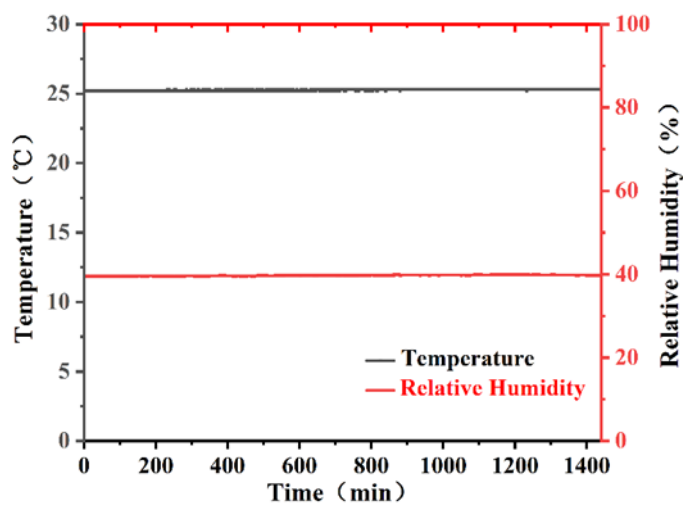

Fig.S15 Temperature and relative humidity in the laboratory

Table. S1 Crystallographic data of compound Pb-TCPE.

| Crystal data      | Pb-TCPE                     |
|-------------------|-----------------------------|
| CCDC number       | 2339838                     |
| Empirical formula | $C_{36}H_{32}N_2O_{11}Pb_2$ |
| Formula weight    | 1083.04                     |

|                                                              |                                 |
|--------------------------------------------------------------|---------------------------------|
| Temperature                                                  | 293(2)                          |
| Wavelength (Å) /MoK $\alpha$                                 | 1.3405                          |
| Crystal system                                               | monoclinic                      |
| Space group                                                  | <i>P2<sub>1</sub>/n</i>         |
| <i>a</i> (Å)                                                 | 16.4600(6)                      |
| <i>b</i> (Å)                                                 | 11.3441(5)                      |
| <i>c</i> (Å)                                                 | 19.5207(6)                      |
| $\alpha$ (°)                                                 | 90                              |
| $\beta$ (°)                                                  | 94.325(3)                       |
| $\gamma$ (°)                                                 | 90                              |
| <i>V</i> (Å <sup>3</sup> )                                   | 3634.6(2)                       |
| <i>Z</i>                                                     | 4                               |
| <i>Calcd.</i> density (g cm <sup>-3</sup> )                  | 1.979                           |
| Absorption coefficient (mm <sup>-1</sup> )                   | 9.314                           |
| <i>F</i> (000)                                               | 2056                            |
| Reflections collected                                        | 47011                           |
| Completeness to $\theta = 53.54^\circ$                       | 96.9%                           |
| Data/restraints/parameters                                   | 8189/264/527                    |
| Goodness-of-fit on <i>F</i> <sup>2</sup>                     | 1.052                           |
| Final <i>R</i> indices [ <i>I</i> > 2 $\sigma$ ( <i>I</i> )] | <i>R</i> <sub>1</sub> = 0.0446  |
|                                                              | <i>wR</i> <sub>2</sub> = 0.1300 |

---


$${}^aR_1 = \sum(F_o - F_c)/\sum F_o. {}^b wR_2 = [\sum w(F_o^2 - F_c^2)^2/\sum w(F_o^2)^2]^{1/2}.$$

Table. S2 Luminescence lifetime parameters of H<sub>4</sub>TCPE ligand and Pb-TCPE.

|                     | $\tau_1$ (ns) | $A_1$ (%) | $\tau_2$ (ns) | $A_2$ (%) | $\tau_3$ (ns) | $A_3$ (%) | $\tau$ (ns) |
|---------------------|---------------|-----------|---------------|-----------|---------------|-----------|-------------|
| H <sub>4</sub> TCPE | 2.17          | 33.84     | 10.78         | 44.72     | 103.95        | 16.44     | 22.75       |
| Pb-TCPE             | 2.97          | 74.62     | 18.68         | 19.85     | 119.56        | 5.52      | 12.52       |

Table. S3 The performance comparison of some reported MOFs and Pb-TCPE.

| Sample                              | Operating field<br>(V mm <sup>-1</sup> ) | Sensitivity<br>( $\mu\text{C Gy}_{\text{air}}^{-1}\text{cm}^{-2}$ ) | Detection limit<br>( $\mu\text{Gy}_{\text{air}}/\text{s}$ ) | Ref.      |
|-------------------------------------|------------------------------------------|---------------------------------------------------------------------|-------------------------------------------------------------|-----------|
| SCU-12<br>(Microcrystalline wafer)  | 43                                       | 23.8                                                                | 0.705                                                       | 22        |
| SCU-13<br>(Membrane)                | NA                                       | 65.86                                                               | 6.553                                                       | 23        |
| Ni-DABDT<br>(Film)                  | 20                                       | 98.6                                                                | 7.2                                                         | 24        |
| Pb-TPCE<br>(Microcrystalline wafer) | 72                                       | 16.6                                                                | 0.0446                                                      | This work |
| Pb-TPCE<br>(Single crystal)         | 1440                                     | 4812.6                                                              | 0.0933                                                      | This work |
